# Supplementary material for: Effects of the spi1a gene on Alzheimer's disease-related phenotypes in a zebrafish model
Source: Research Square preprint supplement (doi:10.21203/rs.3.rs-6961277/v1), 2025-10-08
Supplement: Supplementary file 1 [file 6cc90d2ceacd8f4125b21414.docx]

**Supplementary Materials**

**Table S1. All primer sequences for this experiment.**

| Gene name | Forward primer（5'→3'） | Reverse primer（5'→3'） |
| --- | --- | --- |
| spi1a | CCACTTGAAGGAAGCCCACA | CTGTTACCGGATGTCAGCGA |
| p53 | ATTTAGGCTCAGGTTCCCGC | CACCATTTGAACGGGGCAAG |
| casepase9 | CTGCTGTGTGGTCATCATCC | GACAGTTCTGGCCATTGAGG |
| bax | CGGAGATGAGCTGGATGGAA | CTTCCCCAGTTGAACTTGCC |
| casepase3 | GAGACCGCTGCCCATCACTAG | ATCCTTTCACGACCATCT |
| bcl2 | TGGCGTCCCAGGTAGATAAT | ACCGTACATCTCCACGAAGG |
| casp23 | GTGGTCACCGAATGCCAGTA | ATCCTTTCACGACCATCT |
| ctss2.1 | CGGGTTTATGAGTGACGCCT | ACGCTGGGATGAACTGTAGC |
| fas | TGGAACCATTGCTGCTGCTG | CTTTATCTGTACTCTGGCGGACC |
| grna | TAGAGCAGGTCAGAGGCCAT | CTTATAGTGGGCCGCACAGC |
| ccl35.1 | TGAGCACCTCTCGCTTTGTG | TTGGTCCAATGCGCATACCT |
| tap2a | GATCAGGCAGGACATTGGCT | AAGCTTCCAGGAGAGGCTCA |
| β-actin | TCCCCTTGTTCACAATAACC | TCTGTGGCTTTGGGATTCA |

1. **The effect of the *spi1a* gene on Zebrafish Morphological Development**

We measured the morphological changes in *spi1a-/-* zebrafish to examine the effects of *spi1a* gene knockout on zebrafish morphological development. Compared to 6 dpf WT, no significant morphological changes were observed in *spi1a-/-* (Figure S1 A、D). Statistical analysis showed that the body length of *spi1a-/-* larvae was not significantly different from that of WT (Figure S1 G). We further examined the morphological phenotypes of 6 mpf *spi1a-/-* female and male zebrafish, and no obvious differences were found compared to WT (Figure S1 B、E, C、F). Statistical analysis confirmed that the body lengths of *spi1a-/-* females and males were comparable to those of WT (Figure S1 H-I). These results demonstrate that knockout of the *spi1a* gene does not significantly affect the growth and development of zebrafish.


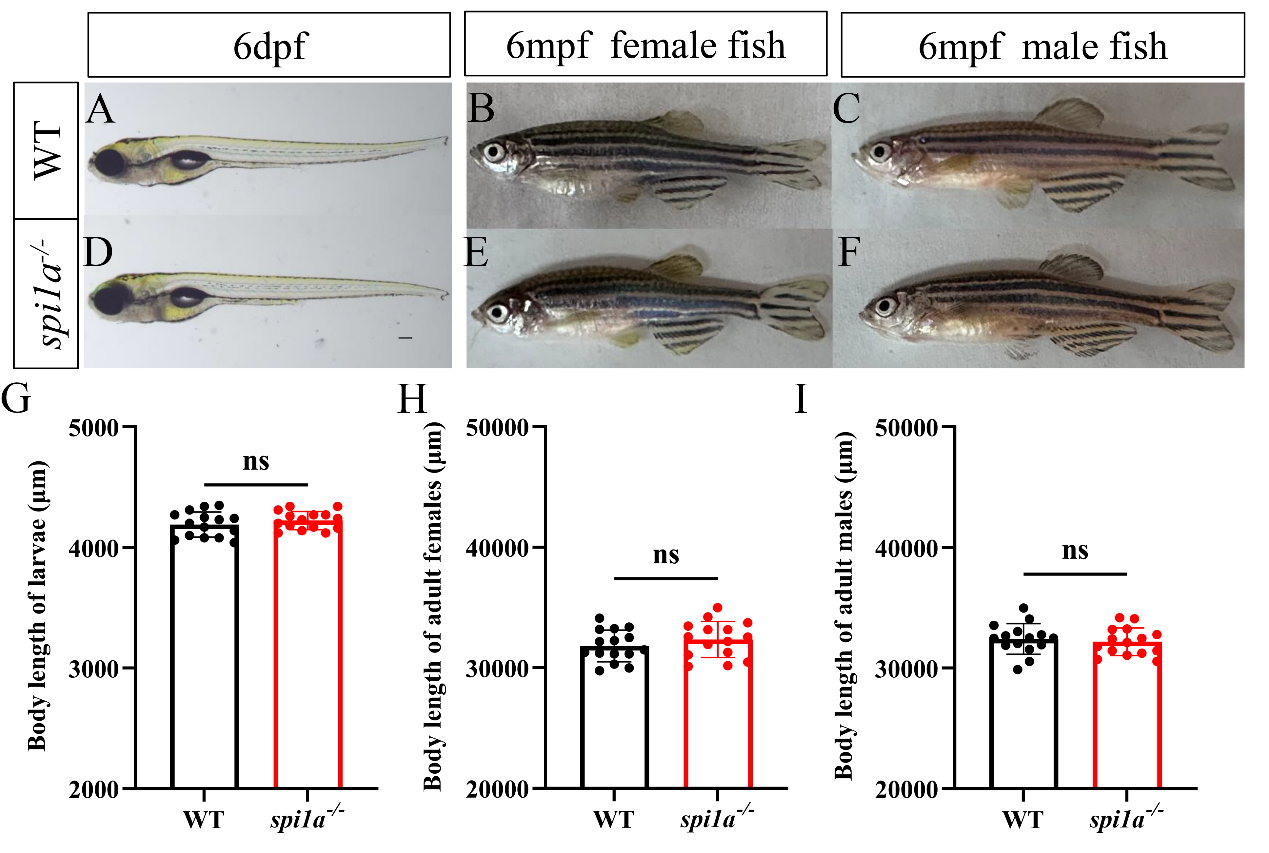


**Figure S1. Morphological observation in zebrafish.** (A-C). Wild-Type zebrafish at 6 dpf, 6 mpf female, and 6 mpf male, respectively. (D-F). *spi1a-/-* zebrafish at 6 dpf, 6 mpf female, and 6 mpf male, respectively. Scale bar: 100 μm. (G-I). Statistical analysis of body length in three groups (6 dpf, 6 mpf female, and 6 mpf male zebrafish; n=15). Data are presented as mean ± SEM; ns: *P*>0.05.


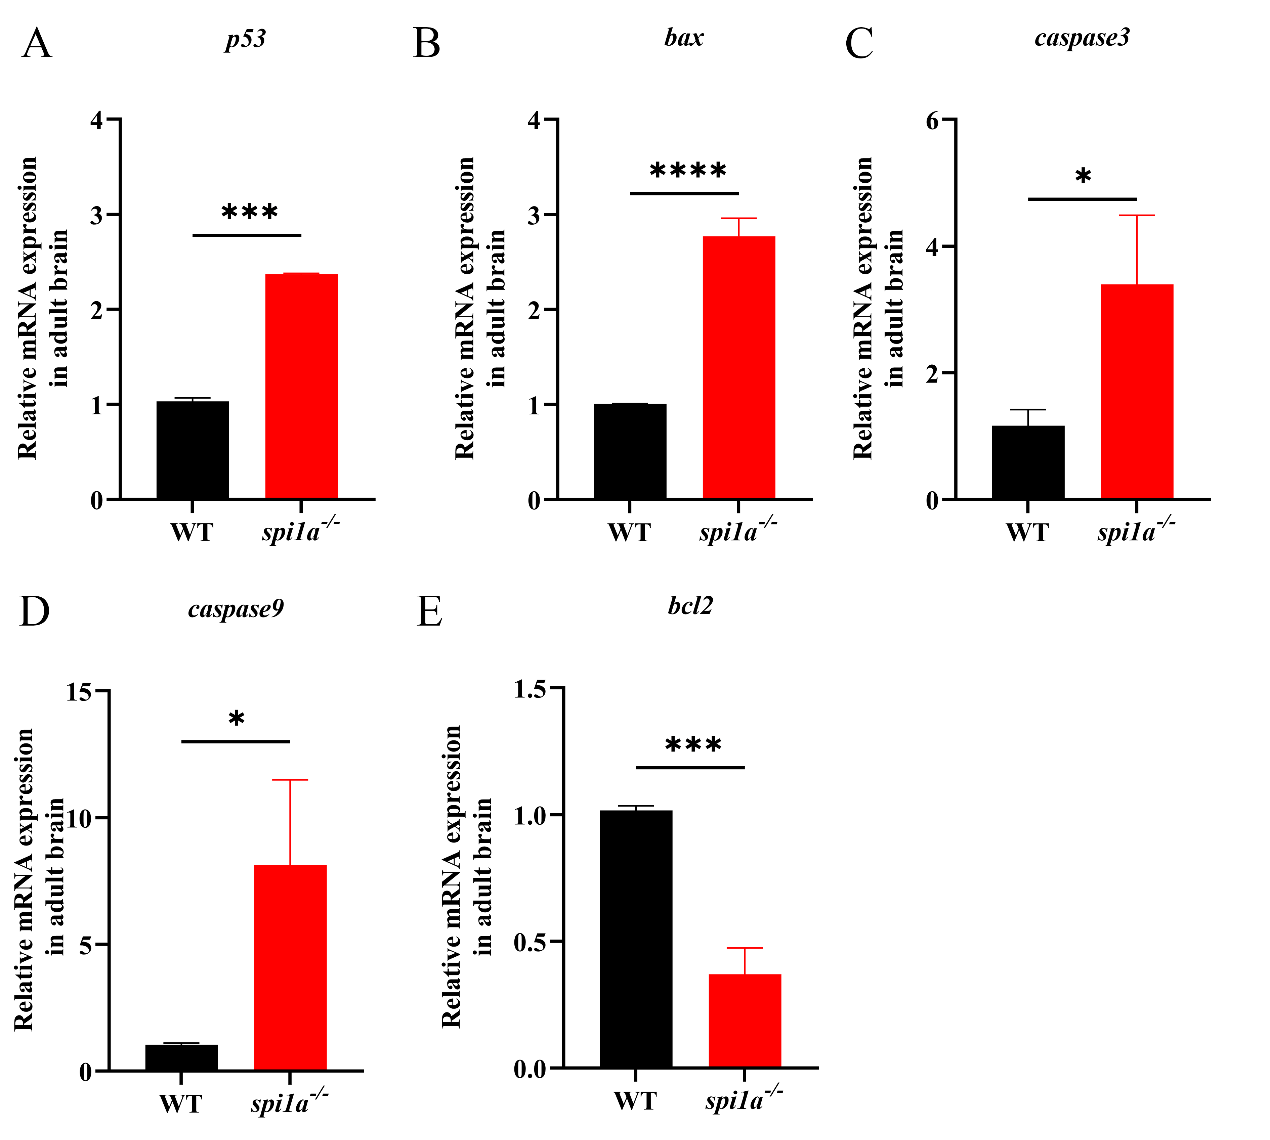


**Figure S2. Expression levels of apoptosis-related genes** **in adult zebrafish brain tissue.** (A-E). qRT-PCR analysis of apoptosis-related genes (*p53*, *bax*, *caspase3*, *caspase9*, and *bcl2*) expression. Data are presented as mean±SEM (n=15, **P*<0.05, ***P*<0.01, ****P*<0.001, *****P*<0.0001).


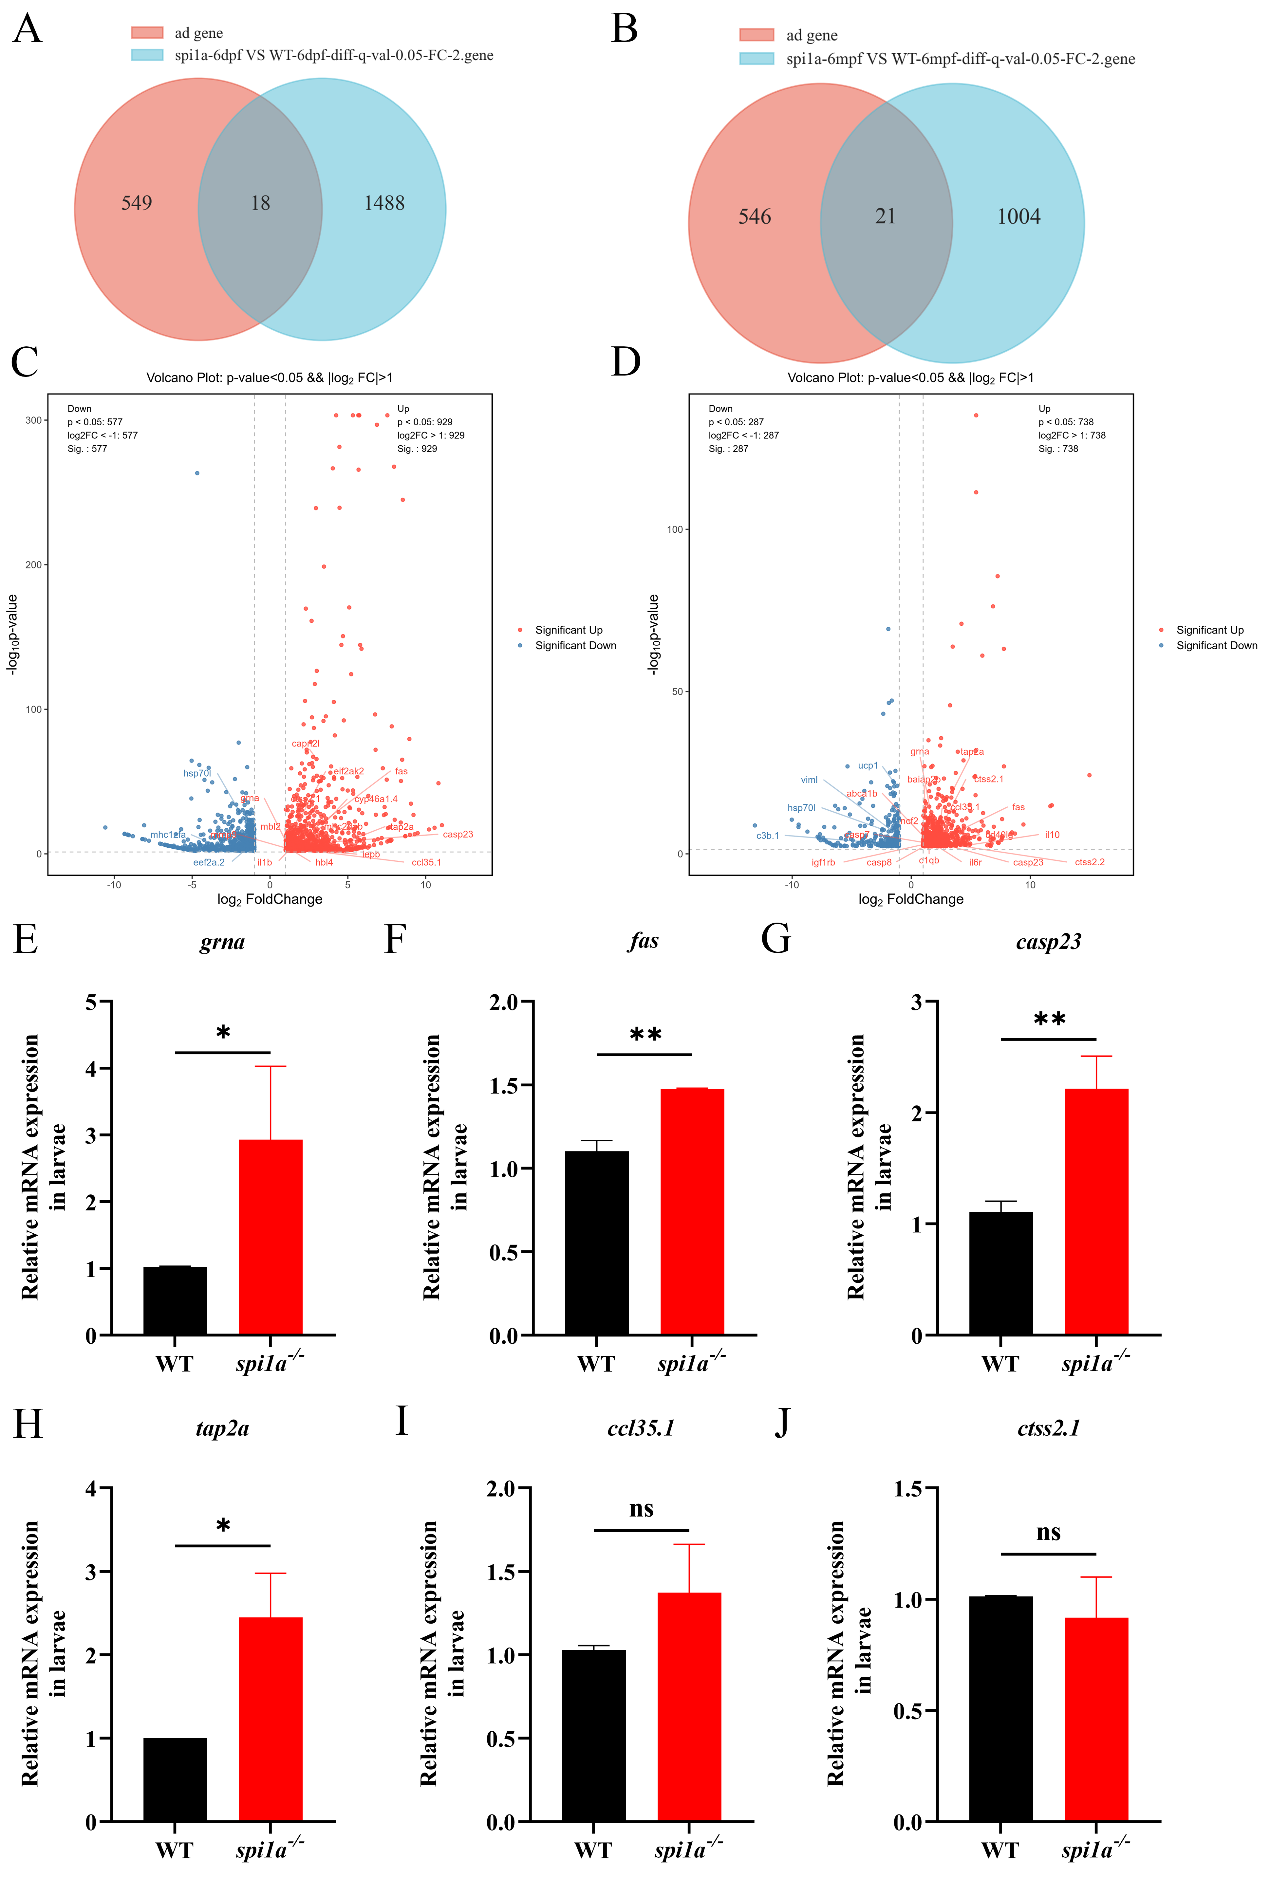


**Figure S3. Expression of AD-related genes in zebrafish larvae.** (A). Venn diagram summarizing all DEGs in 6 dpf *spi1a-/-* larvae, identifying 18 AD-related DEGs. (B). Venn diagram summarizing all DEGs in 6 mpf *spi1a-/-* adult zebrafish brain, identifying 21 AD-related DEGs. (C-D). Volcano plots displaying AD-related DEGs in 6 dpf *spi1a-/-* larvae and 6 mpf *spi1a-/-* adult zebrafish brain respectively, with red dots representing significantly upregulated genes and blue dots indicating significantly downregulated genes. The volcano plots show statistical significance as -log10 P-value (y-axis) versus log2FC (x-axis). (E-J). qRT-PCR analysis of relative expression levels of six DEGs (*grna*, *fas*, *casp23*, *tap2a, ccl35.1*, and *ctss2.1*) in larvae. Data were analyzed using paired two-tailed t-tests and are presented as mean±SEM (ns: *P*>0.05, **P*<0.05, ***P*<0.01).


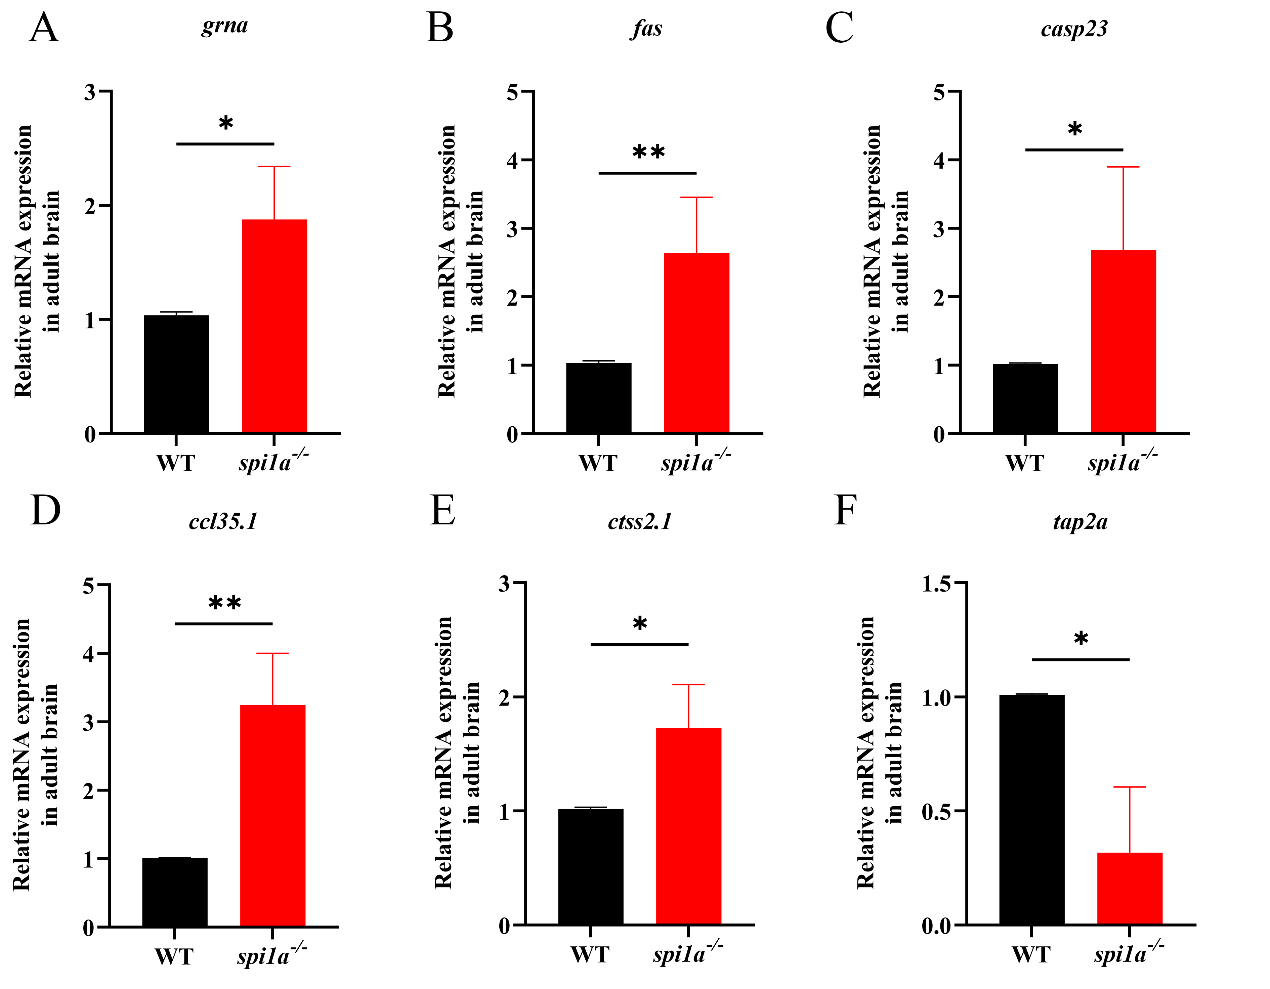


**Figure S4. Expression levels of AD-related genes in adult zebrafish brain.** (A-F). qRT-PCR analysis of relative expression levels of six DEGs (*grna*, *fas*, *casp23*, *ccl35.1*, c*tss2.1*, and *tap2a*) in 6 mpf adult zebrafish brain. Data were analyzed using paired two-tailed t-tests and are presented as mean±SEM (ns: *P*>0.05, **P*<0.05, ***P*<0.01).
